# Supplementary material for: Technical Effectiveness and Safety of Emergent Stenting in Patients With Acute Ischemic Stroke and Carotid Near-Occlusion
Source: Research Square preprint supplement (doi:10.21203/rs.3.rs-7225884/v1), 2025-08-08
Supplement: Supplementary file 1 [file 134ac48458c5503154733779.docx]

|  | Univariable analysis  OR (95%CI) | p | Multivariable analysis  OR (95%CI) | p |
| --- | --- | --- | --- | --- |
| CNO | 1.66 (0.85 – 3.22) | 0.135 | 1.42 (0.58 – 3.48) | 0.437 |
| CNO with FC | 2.11 (0.64 – 6.90) | 0.219 | 2.14 (0.41 – 11.15) | 0.367 |
| CNO without FC | 1.41 (0.66 – 3.02) | 0.377 | 1.14 (0.42 – 3.12) | 0.797 |
| Female sex | 0.96 (0.57 – 1.61) | 0.879 |  |  |
| Age (10 years increase) | 0.63 (0.51 – 0.77) | <0.001 | 0.70 (0.52 – 0.95) | 0.020 |
| Hypertension | 0.36 (0.21 – 0.60) | <0.001 | 0.52 (0.25 – 1.08) | 0.080 |
| Diabetes | 0.64 (0.37 – 1.10) | 0.108 |  |  |
| Dyslipidemia | 0.81 (0.50 – 1.31) | 0.385 |  |  |
| Previous stroke/TIA | 0.94 (0.48 – 1.86) | 0.864 |  |  |
| Current smoker | 1.67 (1.02 – 2.71) | 0.040 | 1.23 (0.65 – 2.33) | 0.534 |
| Atrial fibrillation | 0.25 (0.22 – 0.58) | 0.001 | 0.66 (0.21 – 2.07) | 0.478 |
| Ischemic heart disease | 0.99 (0.47 – 2.09) | 0.974 |  |  |
| Previous antithrombotic treatment | 0.67 (0.41 – 1.10) | 0.109 |  |  |
| M1 occlusion | 0.78 (0.47 – 1.29) | 0.329 |  |  |
| M2 occlusion | 1.75 (0.91 – 3.37) | 0.094 |  |  |
| TICA occlusion | 0.83 (0.44 – 1.58) | 0.578 |  |  |
| Other (distal branch of MCA or ACA) | 1.06 (0.42 – 2.66) | 0.902 |  |  |
| Isolated involvement of extracranial ICA | 1.40 (0.64 – 3.10) | 0.404 |  |  |
| Baseline ASPECTS (1 point increase) | 1.18 (1.01 – 1.37) | 0.031 | 1.11 (0.91 – 1.35) | 0.302 |
| Baseline NIHSS (5 point increase) | 0.54 (0.44 – 0.67) | <0.001 | 0.44 (0.33 – 0.60) | <0.001 |
| Intravenous thrombolysis | 1.93 (1.18 – 3.18) | 0.009 | 2.55 (1.28 – 5.09) | 0.008 |
| Onset-to-femoral access (1 hour increase) | 0.98 (0.94 – 1.01) | 0.188 |  |  |
| Onset to recanalization (1 hour increase) | 0.97 (0.94 – 1.01) | 0.136 |  |  |
| Procedural time (1 hour increase) | 0.75 (0.51 – 1.10) | 0.143 |  |  |
| Number of passes | 0.89 (0.77 – 1.04) | 0.142 |  |  |
| mTICI2c/3 | 2.52 (1.47 – 4.33) | 0.001 | 2.82 (1.36 – 5.83) | 0.005 |
| Revascularization failure | 0.75 (0.38 – 1.48) | 0.401 |  |  |
| Antiplatelet during the procedure  *None*  *Single*  *Dual*  *Aspirin*  *Clopidogrel*  *GP IIb/IIIa inhibitors* | *0.53 (0.18 – 1.54)*  *0.64 (0.37 – 1.12)*  *2.13 (1.14 – 4.012)*  *1.20 (0.64 – 2.25)*  *10.68 (1.37 – 83.32)*  *1.38 (0.79 – 2.39)* | *0.242*  *0.118*  *0.019*  *0.570*  *0.024*  *0.258* | *1.07 (0.46 – 2.52)*  *11.10 (1.08 – 113.99)* | *0.877*  *0.043* |
| Early DAPT after the procedure (<12h) | 1.59 (0.83 – 3.04) | 0.161 |  |  |
| ICH | 0.41 (0.23 – 0.71) | 0.001 | 0.69 (0.33 – 1.47) | 0.338 |
| sICH | 0.05 (0.01 – 0.40) | 0.005 | 0.02 (0 – 0.21) | 0.001 |

**Supplemental Table 1. Factors related with good functional outcome (mRS 0 to 2) at 3 months**

*OR, Odds ratio; CI, Confidence interval; TICA, terminal internal carotid artery, MCA, middle cerebral artery; ACA, anterior cerebral artery; ASPECTS, Alberta Stroke Program Early CT Scor; IQR, interquartile range; NIHSS, National Institutes of Health Stroke Scale score; mTICI, modified thrombolysis in cerebral infarction scale; GP IIb/IIIa, glycoprotein IIb/IIIa; DAPT, dual antiplatelet therapy; sICH, symptomatic intracerebral hemorrhage; CNO, carotid near-occlusion; FC, full collapse.*

|  | CNO + Tandem occlusion  (n=41) | Isolated involvement of extracranial ICA (n=11) | p |
| --- | --- | --- | --- |
| Female sex, n (%) | 13 (31.7) | 2 (18.2) | 0.379 |
| Age, mean (SD) | 65.9 (13.4) | 68.8 (18.6) | 0.556 |
| Hypertension | 29 (70.7) | 8 (72.7) | 0.897 |
| Diabetes | 9 (22.0) | 4 (40) | 0.240 |
| Dyslipidemia | 26 (63.4) | 6 (60) | 0.841 |
| Previous stroke/TIA | 6 (14.6) | 5 (45.5) | 0.026 |
| Current smoker | 18 (43.9) | 5 (45.5) | 0.927 |
| Atrial fibrillation | 1 (2.5) | 1 (10) | 0.279 |
| Ischemic heart disease | 2 (4.9) | 3 (27.3) | 0.025 |
| Previous antithrombotic treatment | 10 (24.4) | 8 (72.7) | 0.003 |
| M1 occlusion | 19 (47.5) | - | - |
| M2 occlusion | 10 (25.0) | - | - |
| TICA occlusion | 5 (12.5) | - | - |
| Other (distal branch of MCA or ACA) | 7 (17.1) | - | - |
| CNO with full collapse | 16 (39.0) | 2 (18.2) | 0.197 |
| Baseline ASPECTS, median (IQR) | 9 (7 – 10) | 10 (9 – 10) | 0.205 |
| NIHSS, median (IQR) | 16 (11 – 20) | 11 (5 – 17) | 0.174 |
| Intravenous thrombolysis | 18 (43.9) | 3 (27.3) | 0.318 |
| Onset-to-femoral access, median (IQR) | 270 (211 – 533) | 320 (220 – 1425) | 0.497 |
| Onset to recanalization, median (IQR) | 311 (238 – 588) | 375 (161 – 1250) | 0.939 |
| Procedural time, median (IQR) | 47 (28 – 78) | 50 (34 – 91) | 0.939 |
| Number of passes, median (IQR) | 1 (1 – 2) | - | - |
| mTICI2c/3 | 33 (80.5) | - | - |
| Antiplatelet during the procedure  *None*  *Single*  *Dual*  *Aspirin*  *Clopidogrel*  *GP IIb/IIIa inhibitors* | *2 (5.1)*  *31 (79.5)*  *6 (15.4)*  *31 (79.5)*  *1 (2.6)*  *11 (28.2)* | *2 (18.2)*  *6 (54.5)*  *3 (27.3)*  *8 (72.7)*  *1 (9.1)*  *3 (27.3)* | *0.159*  *0.096*  *0.365*  *0.633*  *0.329*  *0.951* |
| Stent measures in mm, mean (SD)  *Length*  *Diameter* | 36.0 (9.7)  7.3 (1.3) | *31.25 (7.9)*  *8.0 (0.9)* | 0.219  0.151 |
| Early DAPT after the procedure (<12h) | 4 (12.9) | 5 (50) | 0.014 |

**Supplemental table 2. Baseline characteristics.** Comparison between CNO with tandem occlusion and CNO with Isolated involvement of extracranial ICA.

*CNO, carotid near-occlusion; FC, full collapse; SD, standard deviation; TICA, terminal internal carotid artery, MCA, middle cerebral artery; ACA, anterior cerebral artery; ASPECTS, Alberta Stroke Program Early CT Score; IQR, interquartile range; NIHSS,* *National Institutes of Health Stroke Scale score; mTICI, modified thrombolysis in cerebral infarction scale; GP IIb/IIIa, glycoprotein IIb/IIIa; DAPT, dual antiplatelet therapy*

|  | CNO + Tandem occlusion  (n=41) | Isolated involvement of extracranial ICA (n=11) | p |
| --- | --- | --- | --- |
| Revascularization failure | 8 (20.5) | 0 (0) | 0.101 |
| Intracerebral hemorrhage | 18 (43.9) | 1 (10) | 0.047 |
| Symptomatic intracerebral hemorrhage | 3 (7.3) | 0 (0) | 0.378 |
| Good functional outcome (mRS 0 to 2) at 3 months* | 22 (61.1) | 8 (80) | 0.267 |

**Supplemental table 3.**

*mRS could be obtained at 3 month in 36 patients of the CNO+tandem occlusion group and in 10 patients with isolated extracranial ICA involvement.

*CNO, carotid near-occlusion; ICA, internal carotid artery; mRS, modified Rankin Scale.*
